# Supplementary material for: Open-source QSAR models for pKa prediction using multiple machine learning approaches
Source: J Cheminform. 2019 Sep 18;11:60. doi: 10.1186/s13321-019-0384-1 (PMC6749653; doi:10.1186/s13321-019-0384-1)
Supplement: Supplementary file 5 — Additional file 5. Predictions of ACD/Labs, ChemAxon and the three models on the benchmark data. [file 13321_2019_384_MOESM5_ESM.xlsx]

## Sheet: acidic
DTXSID

## Sheet: basic
DTXSID
